# Supplementary material for: Bacterial Community Members Increase Bacillus subtilis Maintenance on the Roots of Arabidopsis thaliana
Source: PubMed Central journal article supplement — Phytobiomes J. Author manuscript; Available in PMC 2021 Oct 15. (PMC8519414; doi:10.1094/pbiomes-02-20-0019-r), 2020-10-20
Supplement: NIHMS1677449-supplement-Supplemental_Figures.pdf [file NIHMS1677449-supplement-Supplemental_Figures.pdf]

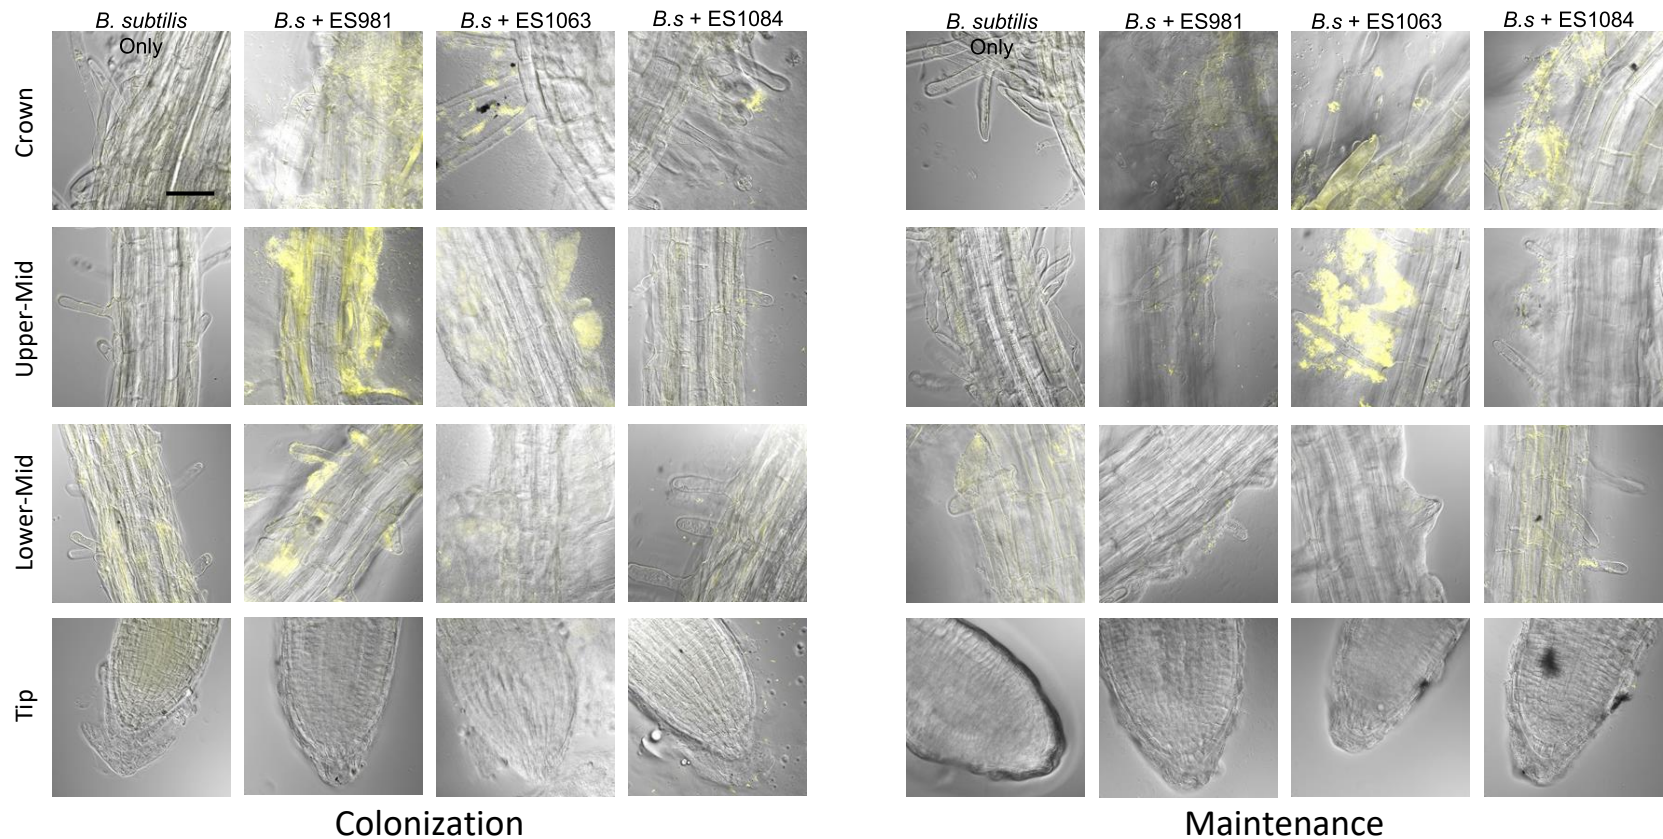

**Supplemental Figure 2.** Localization of *B. subtilis* following colonization and maintenance either alone or in coculture with the indicated strains. Images of bacterial associations with the plant roots were obtained by confocal fluorescence microscopy. Panels show overlays of DIC and fluorescent images where the fluorescent cells are false-colored yellow. Bar, 50  $\mu$ m.

Supp Figure 2

**Supplemental Figure 3.** CFU counts of *B. subtilis* on seedling roots and in the liquid growth medium following colonization in mono-inoculation and co-inoculation with the indicated strains. CFU collected from the root fraction are expressed as CFU/seedling, while CFU collected from the liquid medium fraction are expressed as CFU/mL liquid.

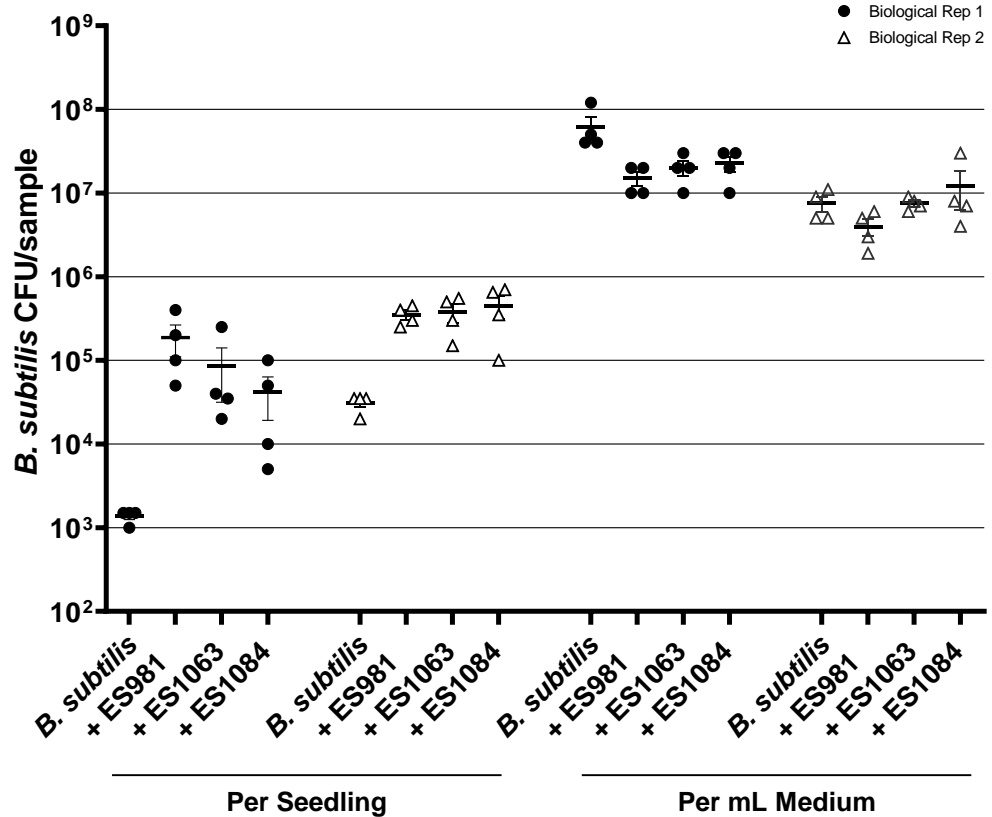

Supp Figure 3
